# Supplementary material for: High-Sensitivity Ammonia Sensors with Carbon Nanowall Active Material via Laser-Induced Transfer
Source: MDPI journal article supplement (doi:10.3390/nano12162830), 2022-08-17
Supplement: s1 [file s1]

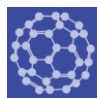

## Supplementary Materials

# High-Sensitivity Ammonia Sensors with Carbon Nanowall Active Material via Laser-Induced Transfer

Alexandra Palla-Papavlu <sup>1,\*</sup>, Sorin Vizireanu <sup>1</sup>, Mihaela Filipescu <sup>1</sup> and Thomas Lippert <sup>2,3</sup>

<sup>1</sup> Lasers Department, National Institute for Lasers, Plasma, and Radiation Physics, Atomîștilor 409, 077125 Măgurele, Romania

<sup>2</sup> Laboratory of Inorganic Chemistry, Department of Chemistry and Applied Biosciences, ETH Zurich, 8093 Zurich, Switzerland

<sup>3</sup> Laboratory of Multiscale Materials Experiments, Paul Scherrer Institute, 5232 Villigen, Switzerland

\* Correspondence: alexandra.papavlu@inflpr.ro or alexandrapalla@yahoo.co.uk

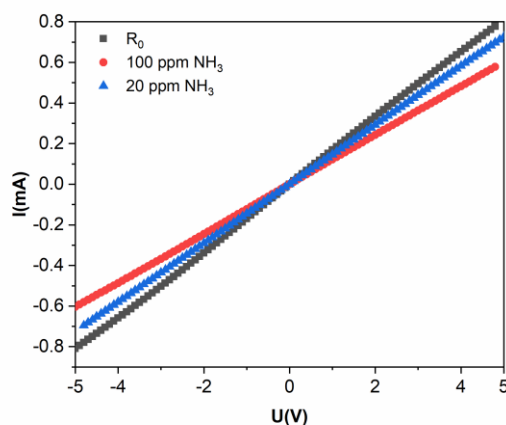

**Figure S1.** I-V characteristics of the laser printed CNW based sensors prior to their exposure to ammonia and when exposed to 20 ppm and 100 ppm.

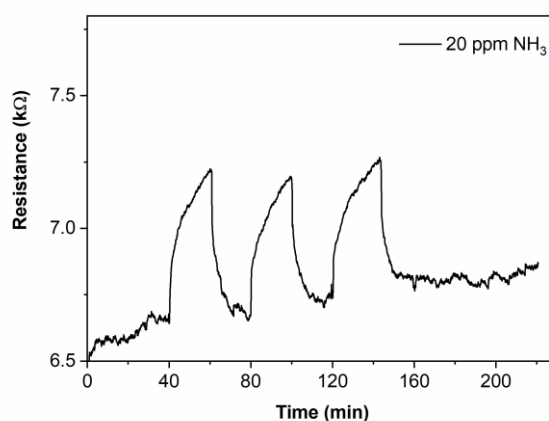

**Figure S2.** Laser printed CNW based sensor responses to successive 20 ppm NH<sub>3</sub> concentrations.
